# Supplementary material
Source: HighWire-hosted journal article supplement (https://www.cmaj.ca/highwire/filestream/58336/field_highwire_adjunct_files/1/image-tu-2-at.pdf)

Appendix 2: Micrograph of a lung nodule showing abundant ectopic endometrial glands with stroma (arrow) (hematoxylin–eosin stain, original magnification × 40).

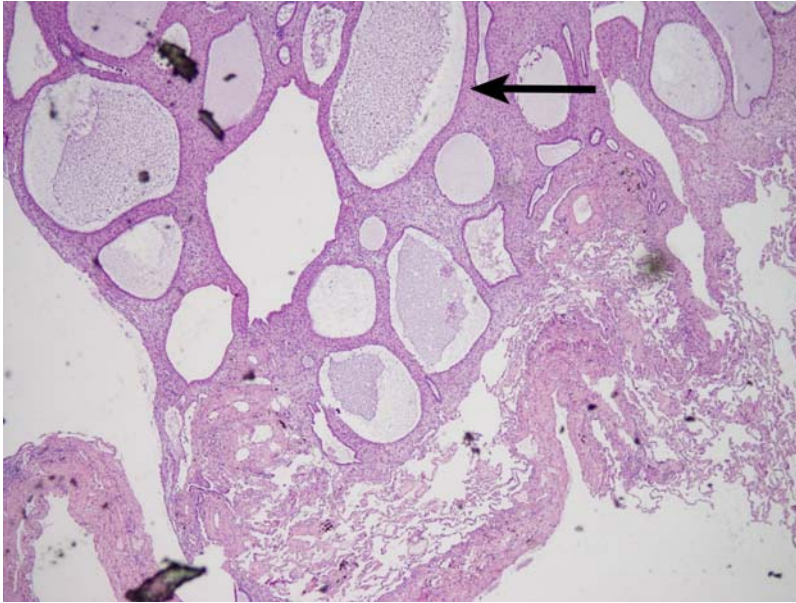

Supplement: image-tu-2-at.pdf [file image-tu-2-at.pdf]
